# Supplementary material for: ATM inhibitor KU60019 synergistically sensitizes lung cancer cells to topoisomerase II poisons by multiple mechanisms
Source: Springer Nature journal article supplement (doi:10.1038/s41598-023-28185-z), 2023-01-17

# Figure 1A and 1B

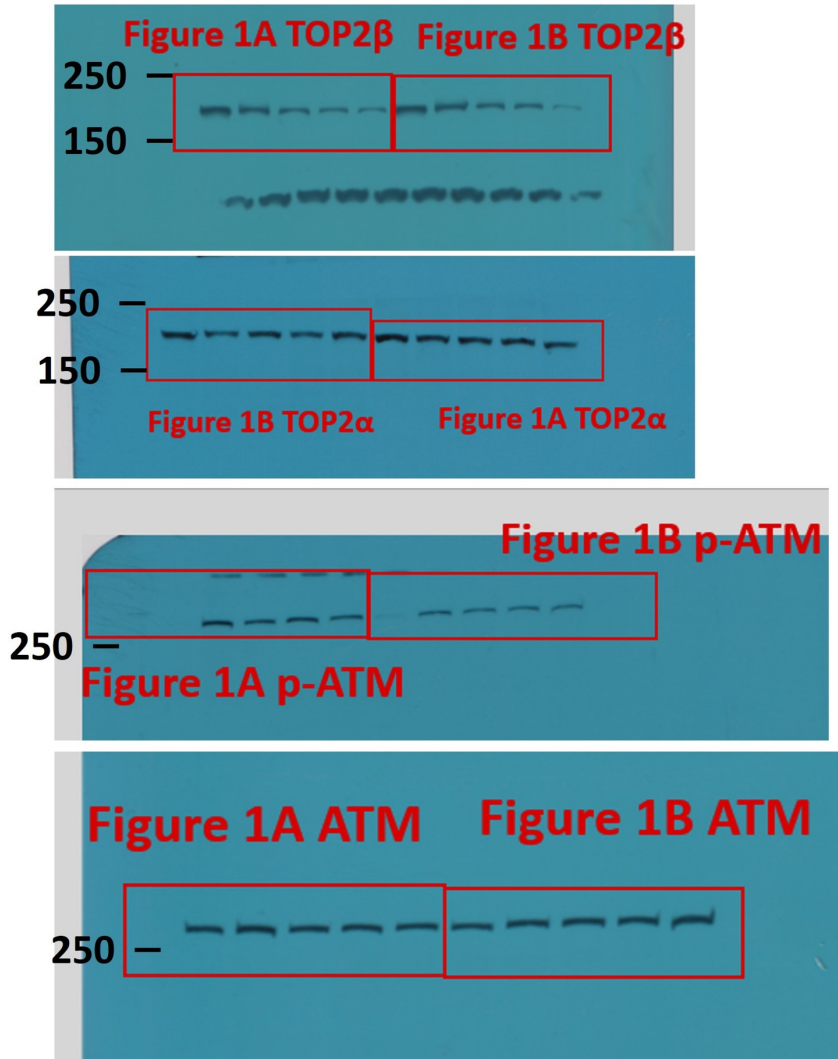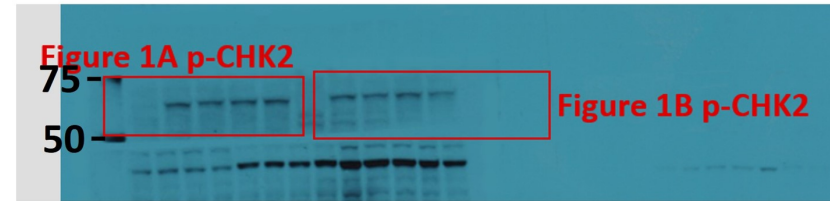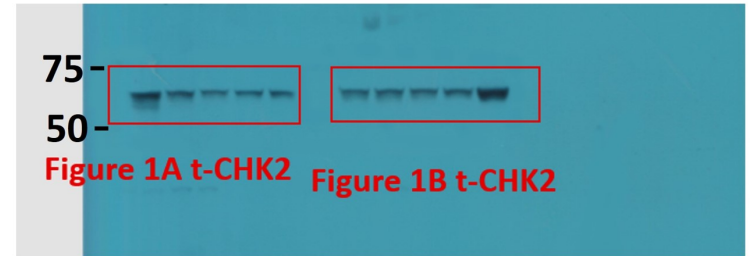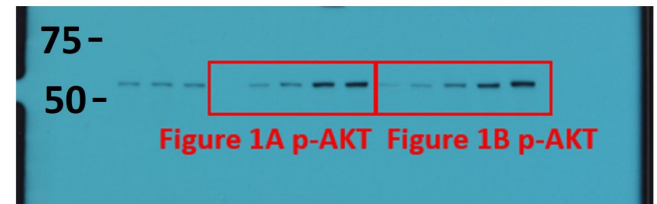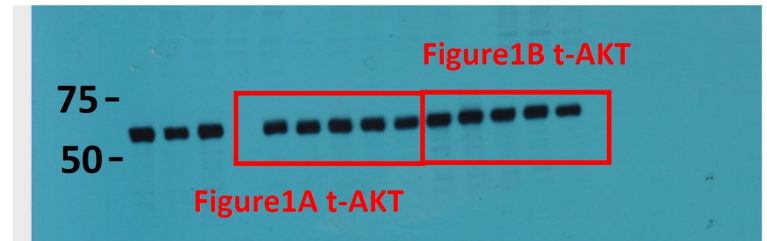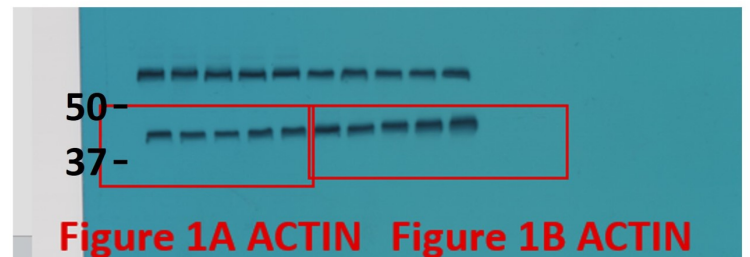

Figure 1C and 1D

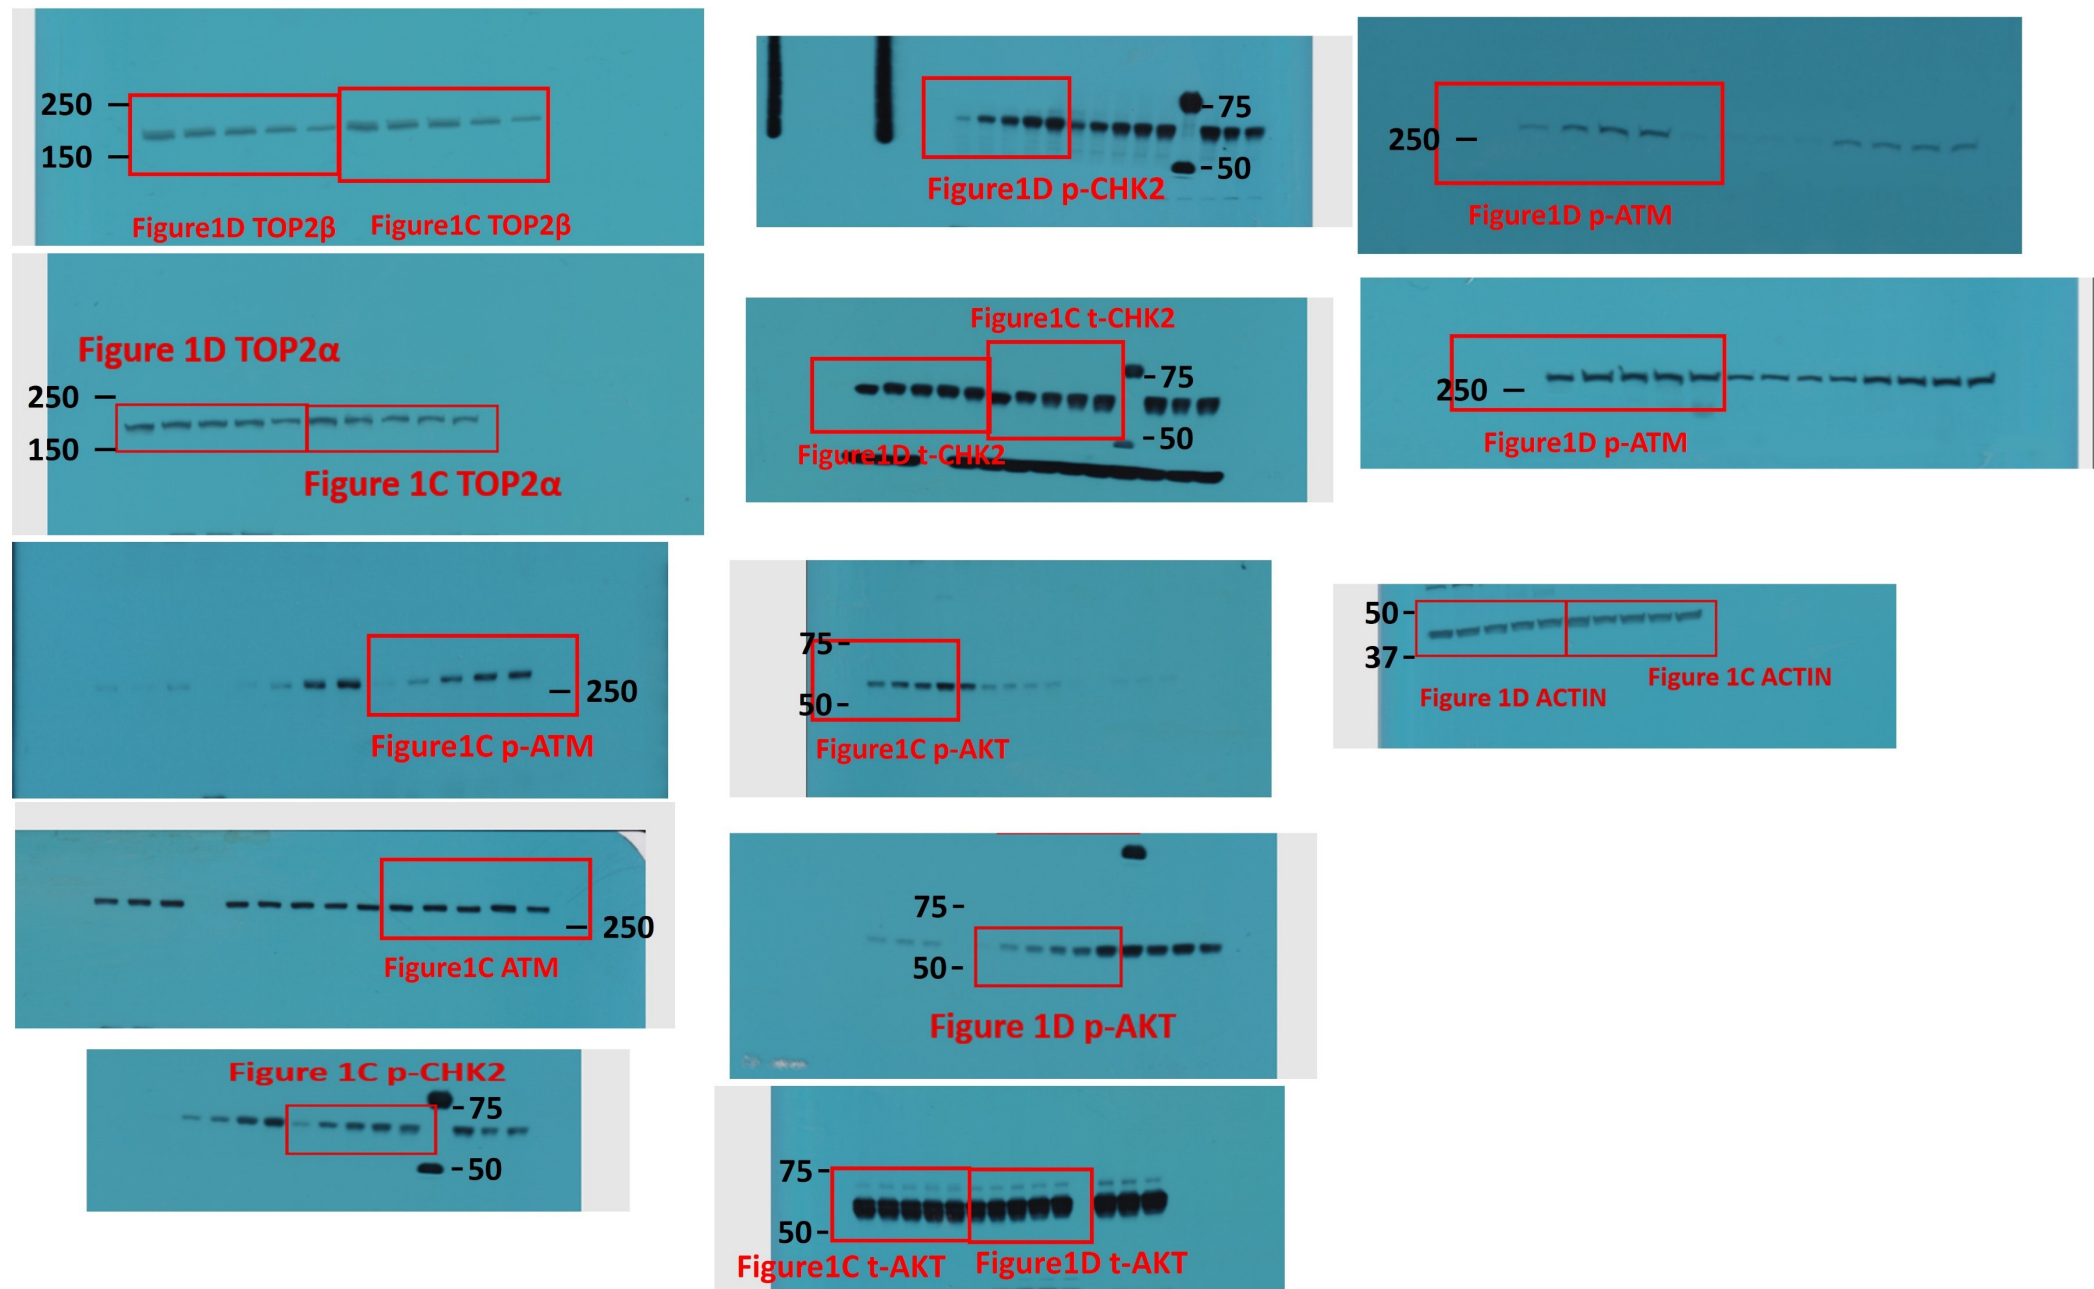

Figure 2A

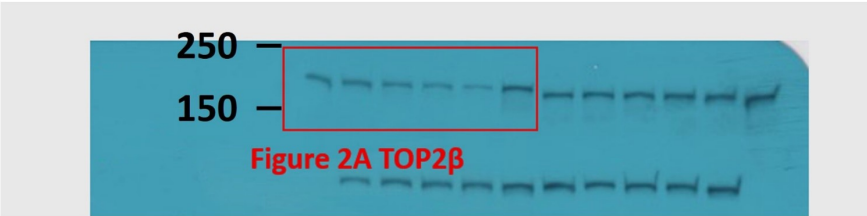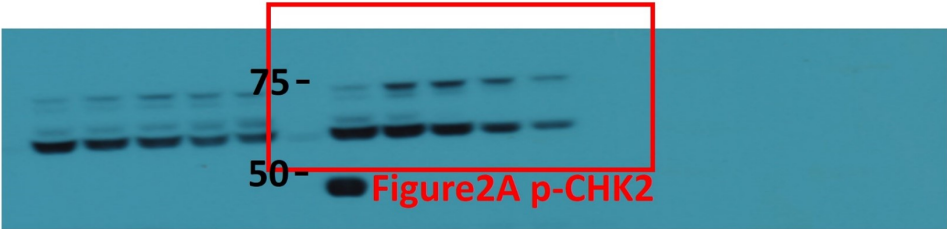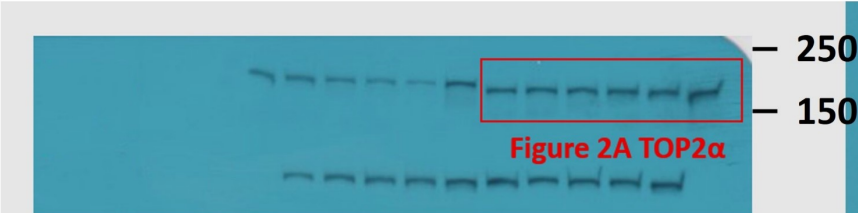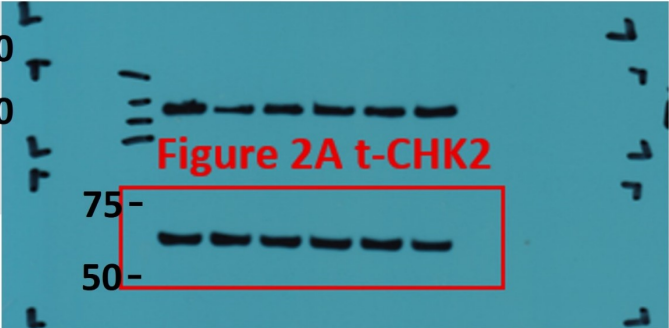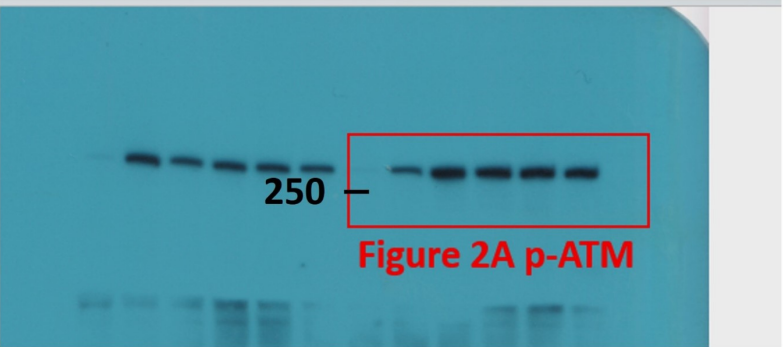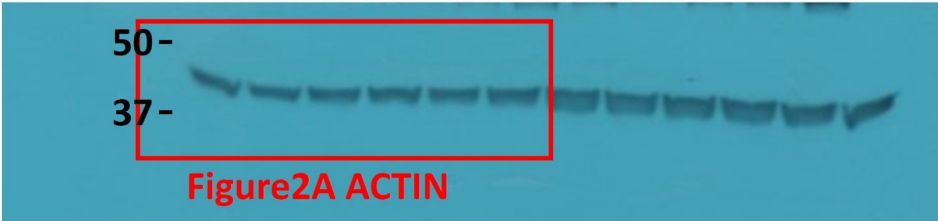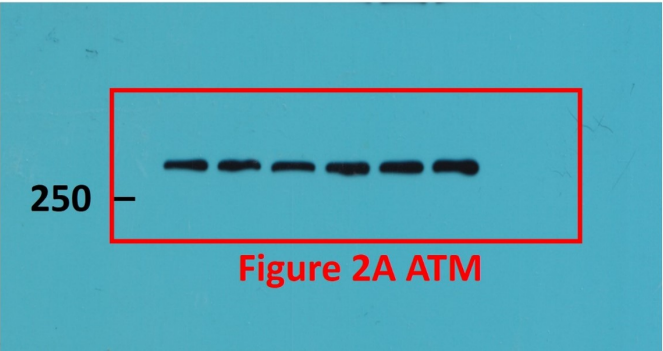



Figure 2B

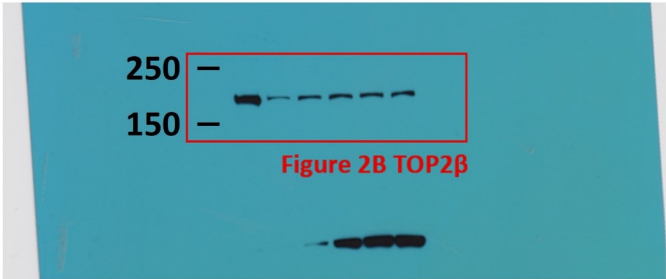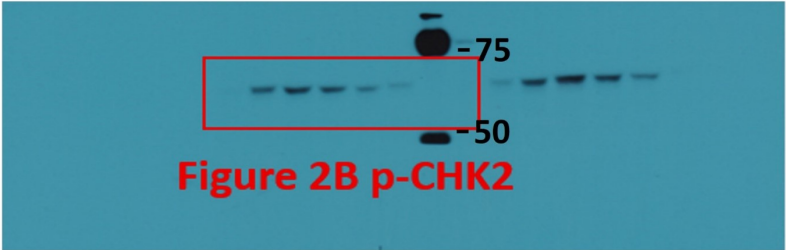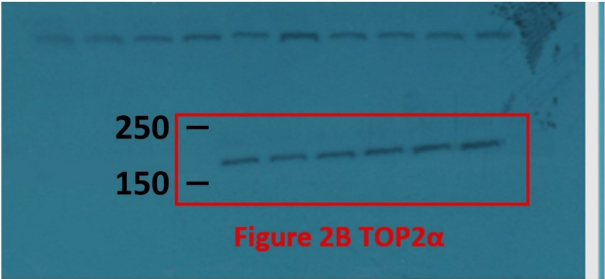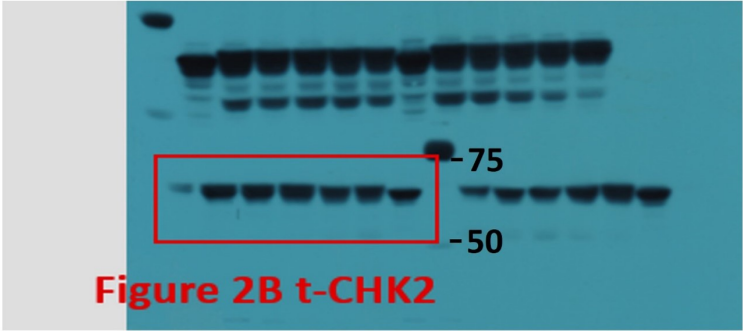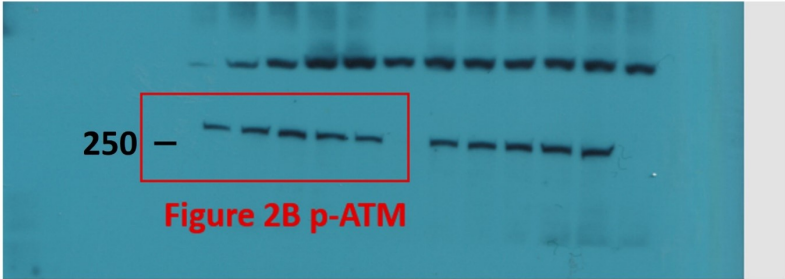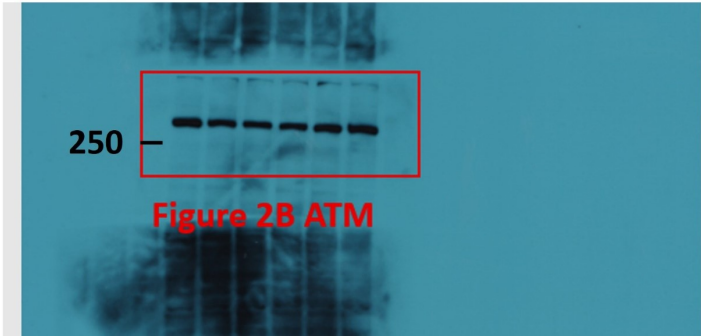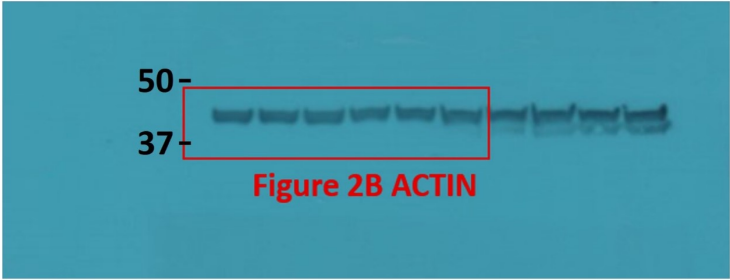

Figure 2C and 2D

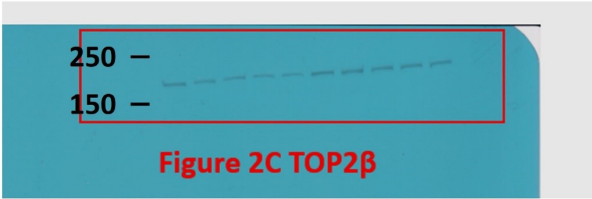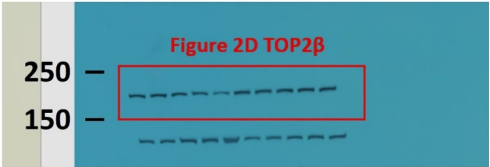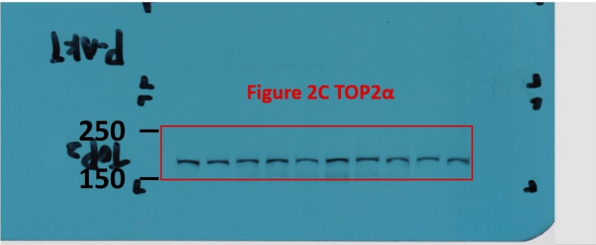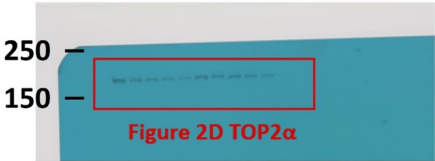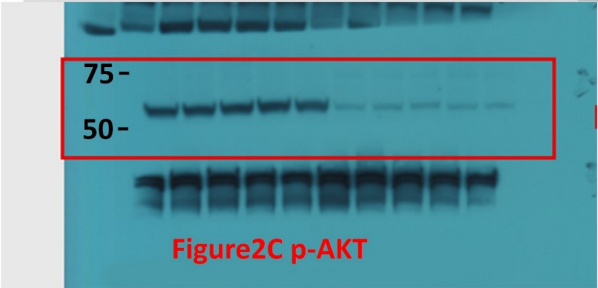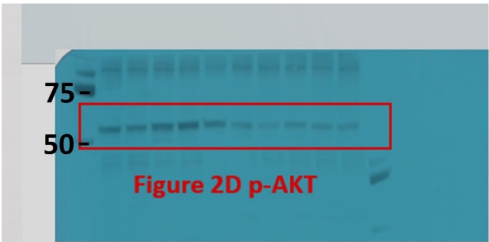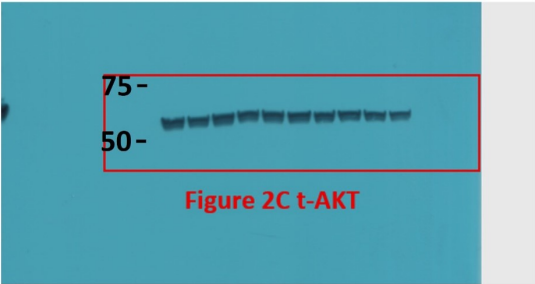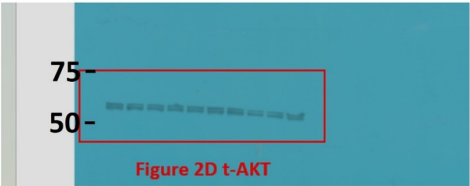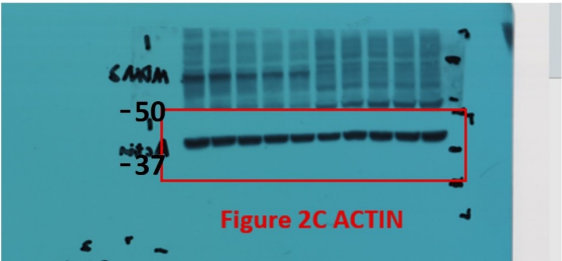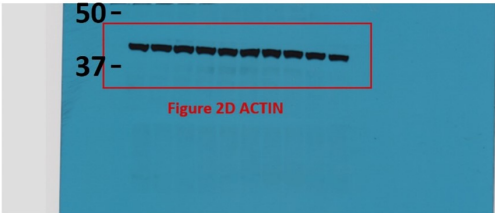

Figure 2E and 2F

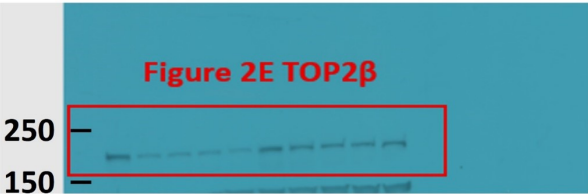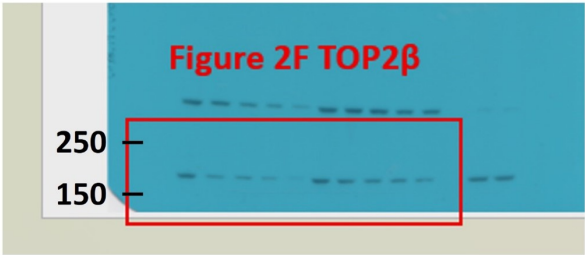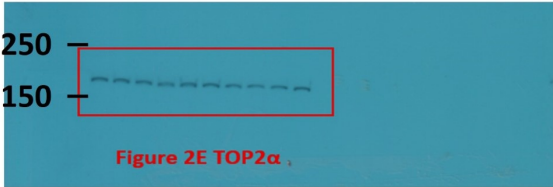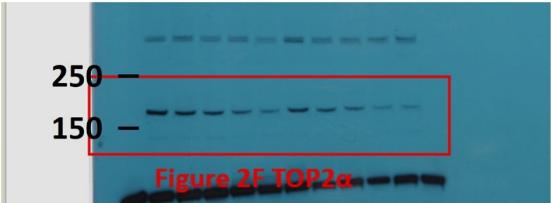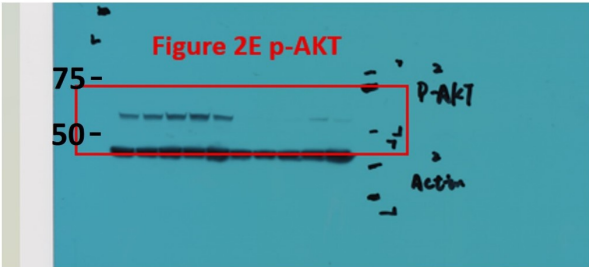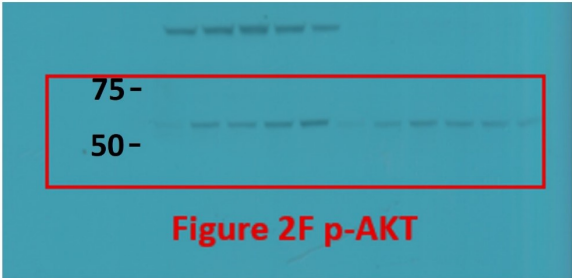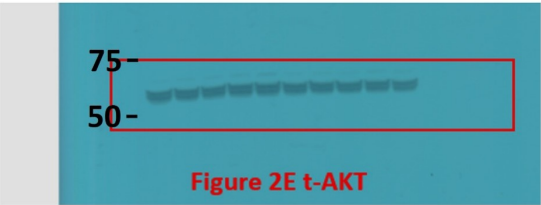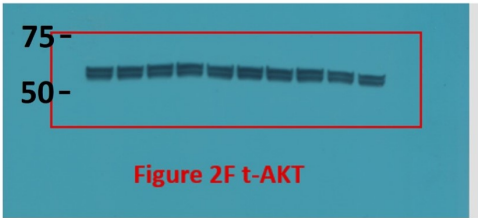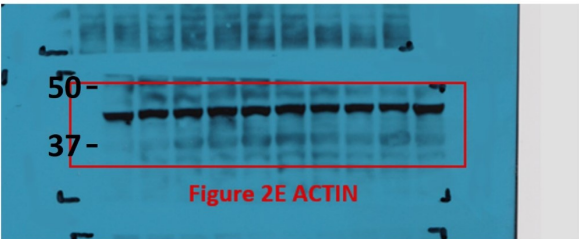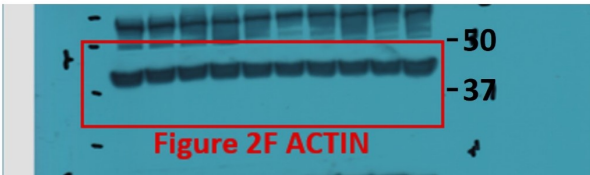

## Figure 3A and 3B

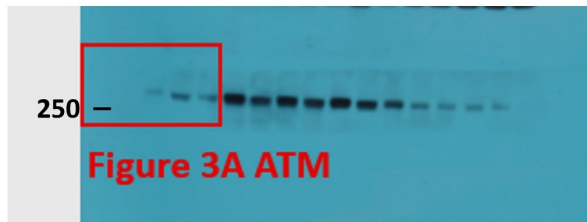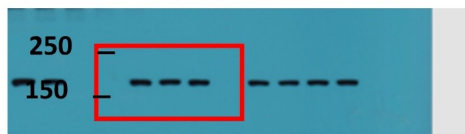

**Figure3A Flag-TOP2β**

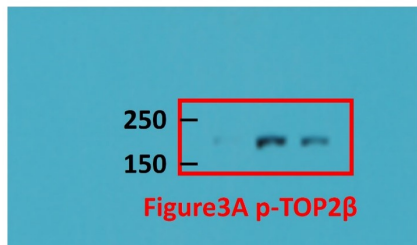

**Figure3A p-TOP2β**

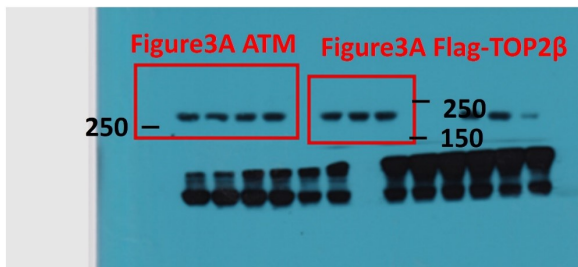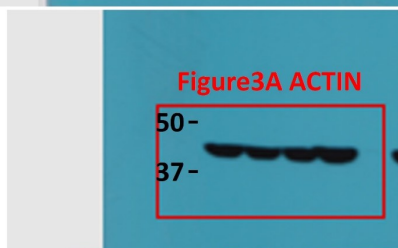

**Figure3A ACTIN**

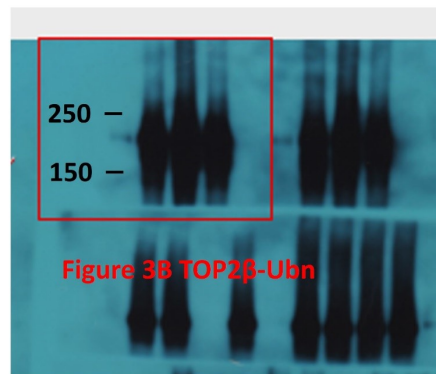

**Figure 3B TOP2β-Ubn**

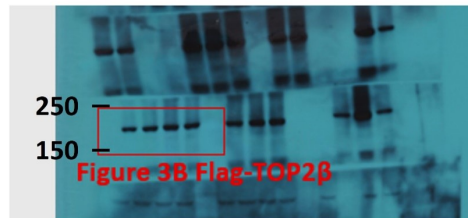

**Figure 3B Flag-TOP2β**

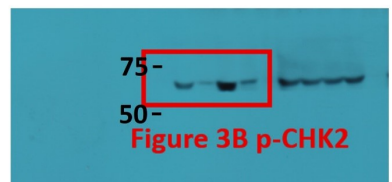

**Figure 3B p-CHK2**

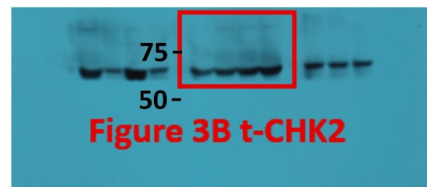

**Figure 3B t-CHK2**

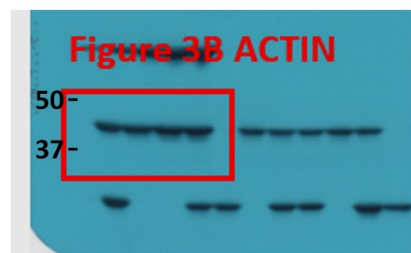

**Figure 3B ACTIN**



Figure 4H

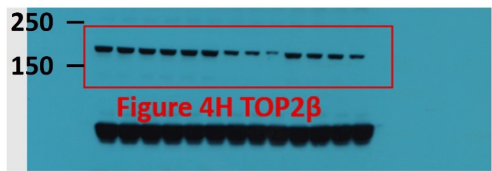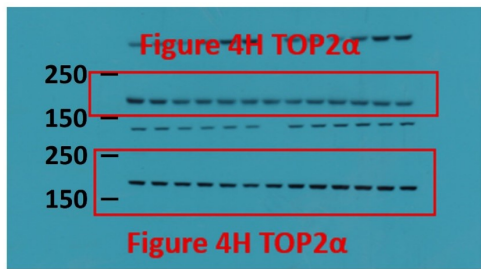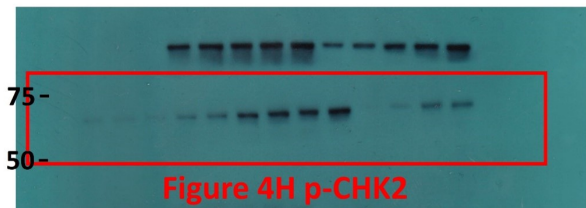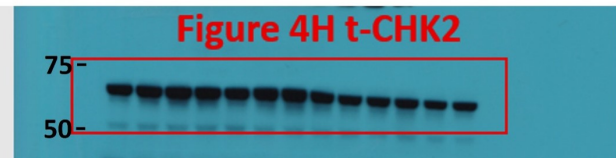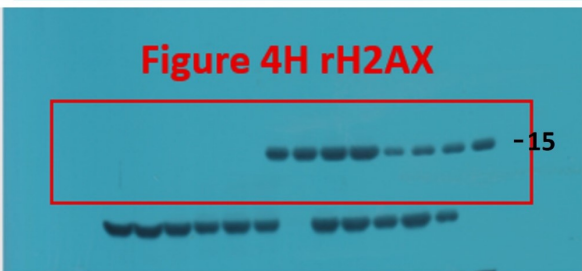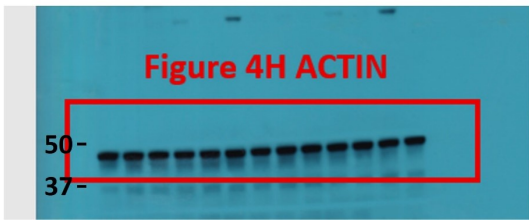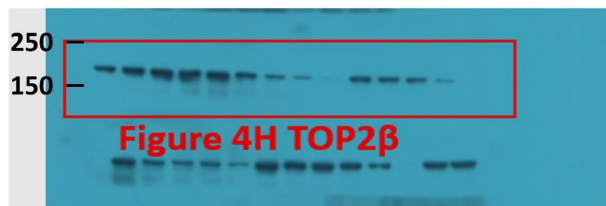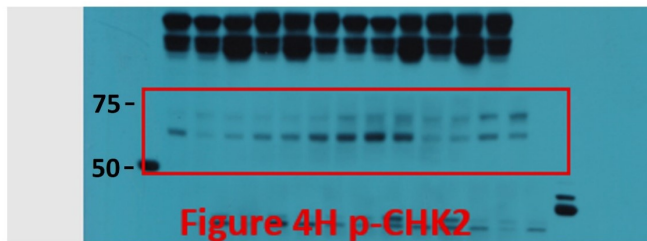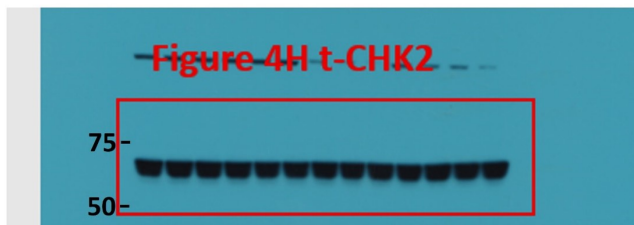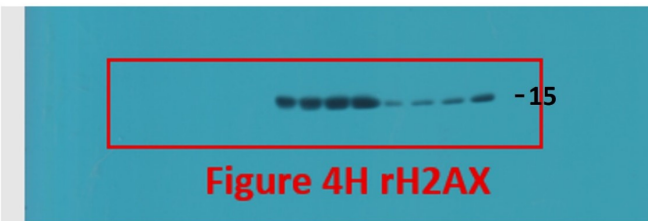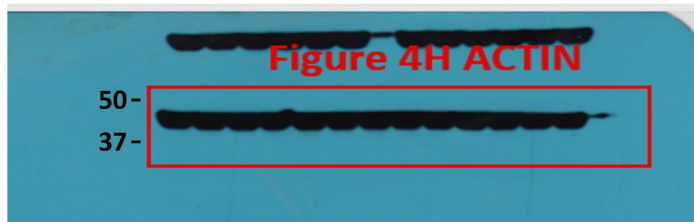



# Figure 6C and 6D

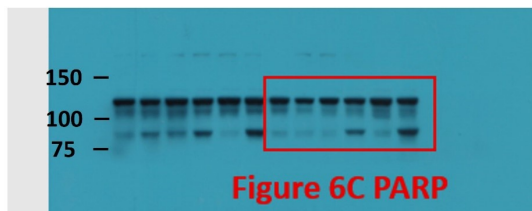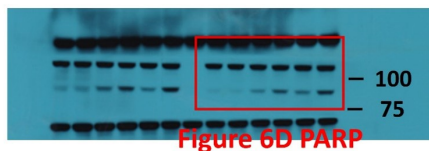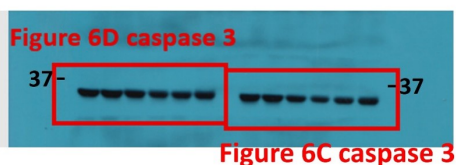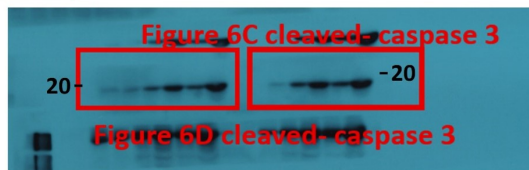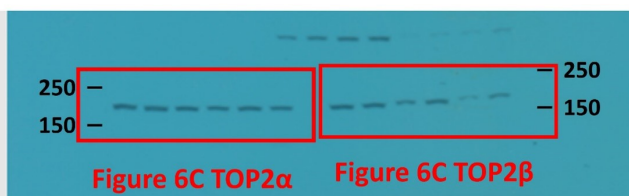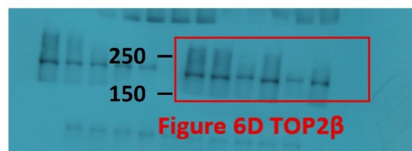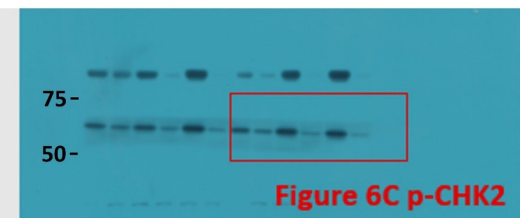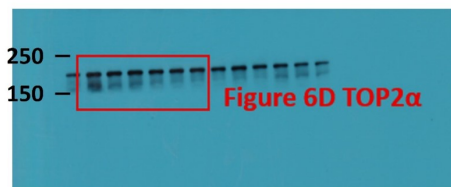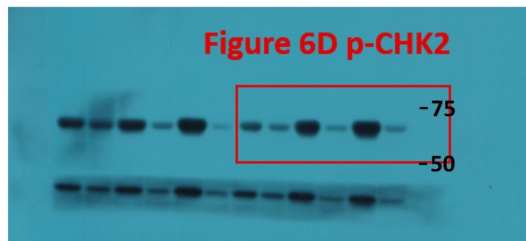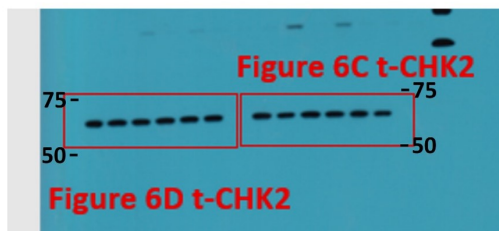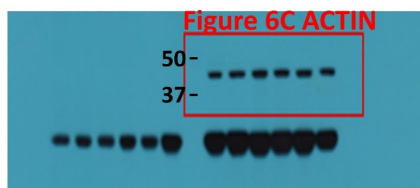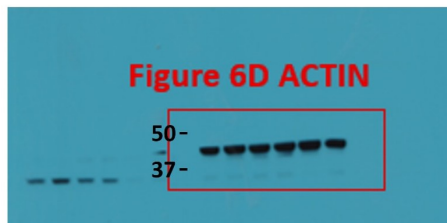

Supplement: MOESM1 [file 41598_2023_28185_MOESM1_ESM.pdf]
